# Supplementary material for: Transcriptome Dynamics and Potential Roles of Sox6 in the Postnatal Heart
Source: PLoS One. 2016 Nov 10;11(11):e0166574. doi: 10.1371/journal.pone.0166574 (PMC5104335; doi:10.1371/journal.pone.0166574)
Supplement: S3 Table — Genes were sorted according to the average ranking calculated from TOM-based connectivities after bootstrap inference (the more connectivity, the smaller the rank). Red: hub genes (ranked in top 5%, cf. S3 Fig). (XLSX) [file pone.0166574.s011.xlsx]

## Sheet: N1
Probe_ID	Gene_symbol	Average_rank	sd
ILMN_2958159	Eno1	3.55	4.95102
ILMN_1233065	Rbmx	5.15	8.27113
ILMN_1244853	Gm16379	6.29	8.36454
ILMN_2741790	Ears2	7.2	9.26926
ILMN_2823778	Msmo1	10.73	11.1263
ILMN_2974720	Igf2bp2	11.83	9.82889
ILMN_2718662	Myl9	16.39	12.4039
ILMN_3138743	Utp14b	16.59	13.1718
ILMN_1222934	Bves	16.77	9.43971
ILMN_2630946	Aprt	18.23	8.64549
ILMN_2651886	Pgk1	19.44	11.0995
ILMN_2945491	Myh7	21.02	15.5368
ILMN_2686069	Gyg	21.44	19.5445
ILMN_2593993	Eif4e2	21.7	12.0801
ILMN_3029294	Rab34	22.12	12.1641
ILMN_2527779	Myh7b	23.16	12.0409
ILMN_2885990	Pdlim3	23.94	14.3526
ILMN_3158909	Banf1	27.4	16.2822
ILMN_1225730	Fdps	27.88	15.8045
ILMN_2673211	Pfn1	28.17	14.5457
ILMN_2621012	Rbpms2	29.22	20.6263
ILMN_2956102	Ncapd2	30.65	16.9791
ILMN_2749847	Gtf2e2	30.75	13.588
ILMN_2615741	Eif3c	30.97	14.9088
ILMN_2745433	Ergic1	31.43	20.3942
ILMN_2672528	Pabpn1	31.56	14.5257
ILMN_2448002	Oxa1l	32.37	13.6557
ILMN_1257515	Mcrs1	32.86	15.7024
ILMN_2867835	Mif	33.99	19.4144
ILMN_2677386	Tcp1	34.84	21.345
ILMN_2713130	Rae1	39.79	22.3536
ILMN_2682613	Igfbp5	40.25	24.9623
ILMN_2713898	Ddr1	40.36	20.6537
ILMN_2908132	Gja5	41.69	32.2943
ILMN_2745551	Olfml2b	46.28	18.8101
ILMN_2678200	Gars	48.49	19.2472
ILMN_2678828	Eif5a	48.98	19.6211
ILMN_2721208	Msto1	49.48	16.67
ILMN_1244836	Tmem41a	49.99	24.0137
ILMN_2714787	1110038B12Rik	50.18	20.8353
ILMN_1235979	Nop58	51.74	19.9361
ILMN_2599777	Pcbp2	51.95	15.8595
ILMN_2761594	Cirbp	52.52	16.3957
ILMN_1259905	Srsf11	52.97	20.0345
ILMN_2849359	Fam96b	54.03	21.3629
ILMN_2707127	Nubp1	54.47	19.2849
ILMN_2682173	Mfsd11	55.47	17.1426
ILMN_2540344	Ubald2	55.53	20.3144
ILMN_1233339	Nme4	56.03	28.2891
ILMN_2778655	Vcam1	56.74	22.81
ILMN_3084818	Nr2c2ap	57.05	40.5606
ILMN_2759235	Rpl28	57.57	19.628
ILMN_2592313	Psenen	57.97	18.7963
ILMN_1260362	Srsf3	57.98	21.9375
ILMN_2707834	Rpl13a	58.28	23.462
ILMN_2723788	Anp32e	58.51	25.2208
ILMN_2610744	Myl4	59.06	40.263
ILMN_2452717	AK011460	60.26	18.0569
ILMN_2694917	Sap30	61.52	25.1133
ILMN_2706269	Hspb1	61.57	20.9585
ILMN_2711948	Slc7a5	61.6	37.9055
ILMN_2763602	Maea	62.25	21.3576
ILMN_2851023	Klhdc3	62.54	19.8796
ILMN_1228613	Pycrl	63.86	19.2333
ILMN_1239110	Eef2	64.12	25.429
ILMN_2741726	Lsm2	64.33	23.345
ILMN_2674979	Fus	64.4	26.4254
ILMN_2756030	Slc8a1	66.52	18.4941
ILMN_2776230	Sumo3	67	21.019
ILMN_2704499	Hprt	68.71	26.3409
ILMN_2715802	Hmga1	68.77	25.1287
ILMN_2761662	Samd4b	69.25	26.4729
ILMN_1226447	Sema4b	69.66	20.2595
ILMN_2688075	Cyp51	72.36	23.1615
ILMN_1249344	Tmem234	72.94	25.5907
ILMN_2957161	Smyd2	73.67	19.337
ILMN_2907655	Bax	73.79	25.3765
ILMN_2733514	Hdac1	75.44	21.9565
ILMN_2965903	Hdc	76.56	21.4529
ILMN_1237961	Gnb5	76.59	23.8734
ILMN_1236358	Chd4	76.75	19.5677
ILMN_2739872	Irx4	76.79	18.8537
ILMN_1230876	Rbm15	77.44	21.1509
ILMN_3161547	Nppa	77.82	28.7656
ILMN_2952779	Cxx1a	77.89	26.1108
ILMN_1233901	Lsm7	78.4	17.2052
ILMN_2829171	Hnrnpf	78.87	20.1051
ILMN_2615259	Limd1	79.46	28.6407
ILMN_1254634	Acpl2	79.68	19.3578
ILMN_2542938	Rps12	81.98	23.2322
ILMN_2799596	Vmac	82.45	24.2522
ILMN_1257965	Ldha	83.36	20.8271
ILMN_2689908	Hsd17b12	83.39	23.094
ILMN_2727695	Nkx2-5	84.1	17.7909
ILMN_2755519	Mrpl54	84.25	18.2759
ILMN_2867033	Smpd2	84.44	29.8824
ILMN_2654754	Pdpn	86.13	36.0602
ILMN_1245979	Ube2n	88.71	21.507
ILMN_1226555	5430417L22Rik	89.85	28.6724
ILMN_2617402	Sec13	89.89	26.9166
ILMN_3096750	Seh1l	90.11	22.8247
ILMN_2602406	Ptpmt1	90.18	19.2261
ILMN_3003567	Khsrp	93.39	20.1579
ILMN_2447100	Micall1	94.58	25.2915
ILMN_2612407	Wdsub1	95.52	19.2199
ILMN_3163044	Ola1	95.95	23.6423
ILMN_1252407	1110008F13Rik	96.01	17.8493
ILMN_2849449	Itga5	96.74	19.4035
ILMN_2725595	Thra	97.59	24.708
ILMN_1218725	Prickle4	97.85	16.6669
ILMN_3156010	Pdzrn3	99.15	18.7074
ILMN_2606243	Ppp2r1a	101.54	15.1314
ILMN_2600255	Bcl9	101.78	14.707
ILMN_2456696	Polr2a	103.09	17.9326
ILMN_1234336	Ybx3	103.27	17.4291
ILMN_2674351	Ednra	104.63	18.9804
ILMN_1218703	4930402H24Rik	106.76	13.9835
ILMN_2986605	Pdss1	107.16	17.0144
ILMN_2726585	Nfib	108.47	15.4426
ILMN_2895213	Lrrc8a	109.48	21.1896
ILMN_1231457	Leprel4	117.39	8.3229

## Sheet: N2
Probe_ID	Gene_symbol	Average_rank	sd
ILMN_1246006	Armcx4	7.7	7.3574
ILMN_1257020	Aldh1b1	8.25	5.42604
ILMN_2653972	Cenpt	9.12	10.3673
ILMN_1377919	Tubb2b	10.36	8.21617
ILMN_2943599	Ngfrap1	11.92	8.69306
ILMN_2518412	Grb10	12.05	11.7236
ILMN_1220398	Armcx2	14.6	11.286
ILMN_2543929	Cenpw	17.35	12.3193
ILMN_2708203	Cdkn1c	17.66	11.3984
ILMN_2992517	Sept6	17.87	13.3384
ILMN_2837195	Fam92a	18.41	9.18177
ILMN_2640971	Pafah1b3	18.58	13.4233
ILMN_1244272	Epb4	21.96	13.9566
ILMN_1260261	Fibp	22.39	12.9286
ILMN_1233954	Ppia	23.37	12.1178
ILMN_2598201	Cox8a	26.5	12.2495
ILMN_3013874	Hnrnpa1	26.6	21.8674
ILMN_2778872	Mad2l1	27.4	15.6805
ILMN_1256343	H19	27.59	19.8805
ILMN_2844996	Actn1	28.5	13.7264
ILMN_2476139	Tuba1c	29.46	20.6228
ILMN_2429025	Wbp5	30.15	21.8625
ILMN_2868133	Gata6	30.94	15.0922
ILMN_1223168	Cdc23	31.23	16.3811
ILMN_1235819	Ran	32.3	13.2012
ILMN_2916035	Lmnb1	32.41	23.5823
ILMN_2881019	Sh3kbp1	32.42	21.2475
ILMN_2832979	Gpc3	33.24	18.8707
ILMN_2767227	Nudt16l1	33.43	17.3847
ILMN_2426115	Cflar	37.08	26.1892
ILMN_2762255	Ap2s1	39.85	18.2128
ILMN_2943661	Trappc1	41	18.9774
ILMN_2968907	Tipin	41.33	18.9353
ILMN_2706061	Sfpq	41.64	20.8125
ILMN_2883414	Cenpl	42.7	28.2544
ILMN_2674281	Fam211a	42.96	19.1712
ILMN_2690976	Cdk4	43.87	25.8725
ILMN_3131063	Ccnd3	44.55	28.4564
ILMN_2638875	Cox6a1	45.56	18.7656
ILMN_3011719	Hjurp	47.06	26.6423
ILMN_1247704	Hmgn3	48.99	24.2243
ILMN_2892650	Tmem35	49.33	20.6163
ILMN_3156604	Hmgb2	50.66	34.0001
ILMN_2721360	Galk1	50.91	20.449
ILMN_2656871	Tmem97	52.33	22.8168
ILMN_2597769	Igf2	52.75	31.6564
ILMN_2610105	Snrpd1	54.69	31.4979
ILMN_2607765	Mmgt2	56.91	18.7606
ILMN_1253093	Wasf1	58.39	26.5036
ILMN_3161626	Prkag2	59.23	25.3831
ILMN_1248410	Rtn3	60.48	23.8677
ILMN_2683190	Orc6	60.88	26.9995
ILMN_2741063	Aif1l	65.95	27.8507
ILMN_2513173	Snhg5	66.35	24.5021
ILMN_3162089	Snx4	67.94	19.6401
ILMN_1235050	Idh3b	70.29	22.3029
ILMN_2733852	Gnb1	70.48	19.0833
ILMN_2859847	Pygl	70.58	28.8368
ILMN_2653207	Tead2	72.48	41.9147
ILMN_1213858	Itgb3bp	72.95	26.8924
ILMN_2686745	Rgs12	73.08	27.6317
ILMN_2679077	Nhp2	73.13	28.4827
ILMN_2718217	Tubb6	73.33	30.8381
ILMN_2739965	Csnk1d	73.63	40.7433
ILMN_2682623	Aup1	73.98	27.0372
ILMN_2677408	Prmt1	74.58	23.7087
ILMN_1225187	H2afv	75.17	36.2664
ILMN_2978570	Prpf38a	75.31	29.8561
ILMN_1229529	Hsd17b7	75.49	23.6611
ILMN_2751494	Stk39	76.07	24.1126
ILMN_2996021	Znf326	77.58	26.3723
ILMN_2602855	Nup205	79.82	31.799
ILMN_2862111	Hmgn2	81.06	23.8153
ILMN_1233064	Cdk2	81.69	44.8728
ILMN_1227225	Trim28	83.58	32.2491
ILMN_2430220	Tmem2	84.49	29.0828
ILMN_1219778	Znf512b	84.83	36.2305
ILMN_2654952	Hmgcs1	84.9	22.0163
ILMN_2700715	Cstb	85.4	24.6433
ILMN_2747744	Alyref	85.9	22.9243
ILMN_1259473	Fen1	86.39	34.7984
ILMN_1213725	Nudt5	88.58	30.8716
ILMN_1247047	Hnrnpa0	88.75	25.811
ILMN_2623536	Golm1	89.23	27.1791
ILMN_2736360	2610002J02Rik	89.56	24.4372
ILMN_2427869	Spata24	90.21	28.5039
ILMN_2766279	Ctc1	90.29	30.9314
ILMN_2908546	Arfgap1	90.45	23.438
ILMN_1239922	Snrpb	91.16	39.5589
ILMN_2800297	Sart3	93.68	28.5749
ILMN_2662160	Impa2	94.83	23.0016
ILMN_2662825	Pank2	95.29	37.8373
ILMN_2621472	Get4	95.87	39.9724
ILMN_2893564	Smim1	97.45	33.2983
ILMN_2691567	Hyi	97.59	33.8688
ILMN_1244484	Robo1	97.7	25.8603
ILMN_3062267	Acot1	98.1	30.5133
ILMN_1253348	Arl6ip1	98.28	32.9947
ILMN_3093089	Tardbp	101.21	30.6005
ILMN_3090793	Nfyc	102.93	26.0893
ILMN_2713586	Haghl	104.01	32.0856
ILMN_1227087	Dazap1	104.54	27.2231
ILMN_3162081	Wdr6	104.56	59.5655
ILMN_2879600	Ptprk	104.79	29.9806
ILMN_2746556	Dkk3	105.03	53.6527
ILMN_2637203	Rfc5	105.04	41.4853
ILMN_2931096	Igf2r	105.07	33.4912
ILMN_1221145	Tsta3	105.68	33.4489
ILMN_2628178	Socs2	108.81	36.2527
ILMN_2702197	Pcbp1	108.91	37.9817
ILMN_2744380	Npc2	109.34	40.0503
ILMN_2602396	Dpy30	109.63	21.2254
ILMN_2775891	Ilf2	110.02	35.7841
ILMN_2612423	Hnrnpab	111.1	23.8812
ILMN_2881857	Pcdh7	111.15	40.3376
ILMN_1232925	Elf4	114.08	45.7162
ILMN_2588254	Eif4a3	114.68	30.4667
ILMN_2939012	1500012F01Rik	116.76	48.8794
ILMN_3091288	Tpd52	117.03	32.0311
ILMN_1240883	Rnf4	117.21	35.9729
ILMN_2907322	Dtx2	117.42	43.9686
ILMN_2483811	Ralgps2	118.32	24.3447
ILMN_2433482	Zwint	118.35	27.8185
ILMN_2620030	Capn2	119.6	40.1157
ILMN_1229309	Vrk1	120.19	42.3837
ILMN_2614644	Sfrs18	120.29	28.0941
ILMN_2862093	Copz1	120.61	43.5948
ILMN_2598852	Ranbp1	120.75	35.4239
ILMN_2877507	Pigq	122.08	41.5793
ILMN_2452237	Tsg101	122.14	30.5548
ILMN_2857086	Tra2a	122.34	35.2452
ILMN_2986393	Tuba1b	123.38	23.6681
ILMN_1250075	Dpysl3	123.43	51.0308
ILMN_2726174	Ints7	124.5	26.9052
ILMN_1246764	Fam122b	125.08	31.8908
ILMN_2616792	Med30	125.22	29.0884
ILMN_1234590	Rps8	127.32	25.6861
ILMN_2694960	Msn	128.86	35.4598
ILMN_3103904	Ptprd	130.56	21.3287
ILMN_2874228	Rpl12	130.68	19.6925
ILMN_2743650	Setd5	131.29	25.2752
ILMN_1249313	Rabl3	131.67	28.7114
ILMN_2970473	Npm1	131.73	30.4998
ILMN_2959480	Eif4a1	131.76	29.1111
ILMN_1218433	Cand1	132.6	23.431
ILMN_2660082	Mcmbp	134.35	26.8514
ILMN_2802311	Gm1673	135.83	30.4173
ILMN_1224770	Gprasp1	135.97	39.6547
ILMN_1239776	AK007605	137.26	29.0028
ILMN_2734290	Jkamp	137.32	36.2608
ILMN_2745889	Acot2	138.71	22.4582
ILMN_1245987	Hnrnpk	139.19	40.6989
ILMN_2497293	AK051928	140.02	25.681
ILMN_2842137	Ilk	140.21	28.7582
ILMN_2744492	Nhsl1	140.68	22.5679
ILMN_1218767	Hnrnph1	141.24	32.9135
ILMN_2683675	Ehmt1	141.62	28.3302
ILMN_2990220	Usp22	141.68	32.815
ILMN_1215085	Fkbp10	146.02	28.3834
ILMN_2712873	Cyb5r3	146.29	42.0753
ILMN_3123473	Aldh18a1	148.82	19.742
ILMN_2622209	Rnaseh2b	149.46	22.5126
ILMN_1245842	Nt5c3b	149.78	28.5938
ILMN_1219580	AK050063	150.39	19.7079
ILMN_2460136	Tnnt1	151.57	25.5035
ILMN_1216388	Uba5	152.48	29.3603
ILMN_2980331	Sumo2	152.86	26.8298
ILMN_1221732	Gnb2	154.43	27.6381
ILMN_1256292	Ilvbl	155.07	23.6238
ILMN_1254840	Smarcb1	156.43	28.9221
ILMN_2868459	Lrrc1	156.88	30.1133
ILMN_1249824	Igf1r	158.74	15.1642
ILMN_2923599	Xpo6	160.05	28.7874
ILMN_2773244	Ptms	160.52	25.2324
ILMN_1244414	Sec61a2	161.38	25.5623
ILMN_1249568	Ctnnbl1	162.26	15.3548
ILMN_2494244	Vdac2	165.8	23.0173
ILMN_2703748	Luc7l	168.54	11.1395
ILMN_2673599	Actn4	169.4	12.0512
ILMN_2636004	Mical2	169.79	21.9404
ILMN_1218358	Gypc	170.02	15.1791
ILMN_2430374	Uba1	171	20.445
ILMN_2878060	Anxa6	171.9	14.8572
ILMN_2684494	Raly	176.11	10.5178
ILMN_2903440	Hnrnpdl	179.04	15.8605
ILMN_2987161	Cnot3	179.78	9.34802

## Sheet: N3
Probe_ID	Gene_symbol	Average_rank	sd
ILMN_2735184	Col18a1	5.79	5.59274
ILMN_2622374	Ndn	6.63	6.16549
ILMN_2613841	Sf3a3	8.06	6.55023
ILMN_1227128	Sox12	9.73	7.18002
ILMN_2742849	Mcm5	12.5	9.69588
ILMN_2451022	Vim	14.03	9.53617
ILMN_2717045	Prdx4	14.63	12.1934
ILMN_3074985	H2afz	15.07	10.8918
ILMN_2746234	Rps26	18.97	14.2874
ILMN_2894497	Rfc2	20.33	15.8644
ILMN_3148662	Srsf5	20.79	10.9722
ILMN_2596611	Clic1	21.16	16.6088
ILMN_1215055	Tia1	23.48	13.7932
ILMN_1241367	Gpx1	25.3	12.7172
ILMN_2544343	Nt5dc2	26.38	16.3125
ILMN_2670398	Eif4ebp1	26.92	17.7972
ILMN_1224754	Ckb	27.26	14.081
ILMN_3088934	2700094K13Rik	27.9	16.7631
ILMN_1242935	Cbx3	29.73	20.066
ILMN_2673917	Spats2l	29.98	19.1933
ILMN_2666690	Cul7	30.28	20.1204
ILMN_2883138	Srd5a3	30.36	15.6615
ILMN_2710312	Prelid1	31.87	20.2593
ILMN_2525605	H2afx	32.46	25.6505
ILMN_2772077	Bok	34.47	19.72
ILMN_1233175	Ppp1r14b	35.31	16.6822
ILMN_2777059	Csad	35.38	17.6863
ILMN_3046283	Ppp2r5c	38.12	21.849
ILMN_2444316	Tpm3	38.21	24.8459
ILMN_2653166	Gpx8	40.51	22.0255
ILMN_2724719	Rhno1	41.56	28.993
ILMN_2607786	Fads1	42.05	35.9133
ILMN_2600537	Sri	42.92	25.7685
ILMN_2654276	R3hcc1	45.73	20.7061
ILMN_2625351	Sh3bgrl3	46.16	30.5471
ILMN_2732190	Pbrm1	47.4	23.7061
ILMN_1232890	Rpl32	48.68	24.9739
ILMN_2645448	Armcx1	48.87	28.1592
ILMN_2657175	Anxa2	49.01	26.0456
ILMN_1213149	AK003962	49.71	24.6393
ILMN_2607377	Itm2a	49.89	21.8234
ILMN_2729861	Bzw1	51.07	25.7879
ILMN_1214810	Arf2	53.12	21.647
ILMN_2607926	Kdelr2	54.53	23.641
ILMN_2841753	Lrrfip1	54.63	24.8623
ILMN_3067068	Tmsb10	54.94	37.6308
ILMN_1227972	Rps16	55.15	22.3414
ILMN_2520032	Zdhhc12	55.93	23.4225
ILMN_2533952	Rps15a-ps4	56.73	18.6931
ILMN_2618642	Rpl7a	57.69	23.2452
ILMN_1221251	Tmem198b	59.21	28.7793
ILMN_2720451	Dnmt1	60.14	27.9053
ILMN_2601907	Ldb1	60.93	35.1411
ILMN_2711551	Rpl39	62.07	25.077
ILMN_2959291	Upp1	63.34	23.5952
ILMN_3140071	Rtn4	64.82	19.6918
ILMN_2971946	Lsm5	65.34	24.2575
ILMN_3000456	Smek1	65.69	33.1134
ILMN_1252817	Lrrc59	66.18	36.2774
ILMN_2539579	Gm10224	67.17	24.4131
ILMN_2613118	Rfc4	67.56	28.4223
ILMN_1213331	Kidins220	68.11	19.3213
ILMN_2487170	Tpm2	69.27	24.5747
ILMN_3143506	Elovl1	69.31	31.4526
ILMN_2742647	Snrpg	71.31	32.2044
ILMN_2652936	Sec11a	72.44	28.4461
ILMN_1230039	Hyal2	72.64	25.6371
ILMN_1234759	Nudt21	72.74	24.0654
ILMN_1236574	Cenpa	72.87	31.7021
ILMN_1234959	Whsc1	72.88	27.0029
ILMN_1247490	Arhgap23	73.33	30.9728
ILMN_1250837	Rangap1	77.49	40.1335
ILMN_1224854	Rpl15	77.89	28.8577
ILMN_2738865	Tra2b	78.4	31.1007
ILMN_2708340	Tex30	78.44	20.9498
ILMN_2902115	Rpl10a	78.93	22.8258
ILMN_2752873	Lgals9	79.14	41.1489
ILMN_2642403	Lmo4	79.21	36.2052
ILMN_2880246	Smarce1	79.31	28.3826
ILMN_2527694	H3f3a	79.42	28.5155
ILMN_2632206	Gnas	80.86	23.2688
ILMN_2727116	Sox4	81.42	48.0415
ILMN_1239293	Sulf2	82.57	25.4667
ILMN_2923865	Casp6	84.53	26.5214
ILMN_2601336	Tbx20	85.42	27.9021
ILMN_2653215	Nagk	85.72	16.8362
ILMN_1260088	Rps28	86.63	24.5475
ILMN_1213070	1700037H04Rik	86.79	49.1385
ILMN_3019002	Srsf10	87.12	32.9353
ILMN_2718416	Eif3k	88.46	32.7212
ILMN_2893993	Cers2	90.47	20.2207
ILMN_2743133	Bcar1	90.51	37.3048
ILMN_1247133	Tns3	90.65	20.6424
ILMN_2673936	Rpl18a	91.12	25.8364
ILMN_1250688	Fat1	91.45	30.834
ILMN_2621847	Cib1	92.3	38.6809
ILMN_2960071	Ppp1ca	92.56	19.9146
ILMN_2687872	Col1a1	93.01	43.133
ILMN_1224518	Rcor1	93.88	27.7959
ILMN_2877069	Tspo	93.99	18.6659
ILMN_2786160	Arhgap1	94.05	46.5482
ILMN_2681604	Ccdc23	94.73	26.9616
ILMN_2658815	Tmem98	94.89	41.6044
ILMN_2996561	Wls	95.58	29.0868
ILMN_2682218	Rpl34	95.73	23.4456
ILMN_2753219	Rpl36a	95.77	25.7081
ILMN_1225930	Rps23	96.24	22.2303
ILMN_2536925	Rpl31-ps20	98.31	27.9295
ILMN_1232274	Rpl36	99.14	22.656
ILMN_2530916	Gm4832	99.96	29.0245
ILMN_2619634	Cfdp1	102.86	22.6154
ILMN_2897617	Rps10	102.91	17.3462
ILMN_2680142	Anxa5	103.33	24.3493
ILMN_2639750	Rps18	103.59	19.7715
ILMN_2424721	Pdgfa	104.61	19.6658
ILMN_2775660	Myl6	105.16	19.5922
ILMN_2667842	Tbrg1	105.19	40.2384
ILMN_2852034	Hif1a	105.76	33.9361
ILMN_2769884	Igf1	107.19	18.8255
ILMN_2747651	Hat1	107.26	32.7132
ILMN_1244219	Twf1	107.63	22.0869
ILMN_1235494	Tmem9	107.87	27.0998
ILMN_2536676	Ftl1	108.81	28.1137
ILMN_2541863	Atxn7l3b	109.97	30.2155
ILMN_2657516	Prr13	111.32	33.4483
ILMN_2915059	Dgkz	112.34	22.1666
ILMN_3009334	Ncaph2	113.26	35.5191
ILMN_2760979	Tgfbr2	113.29	25.2272
ILMN_2930707	Tcf21	114.8	34.0042
ILMN_2418465	Gnai2	115.36	33.9338
ILMN_2781966	Bud31	115.5	20.0073
ILMN_2677712	Arf5	116.94	29.8551
ILMN_1217068	Tusc1	117.31	28.0914
ILMN_2987984	S100a13	117.58	28.8094
ILMN_2527650	Rps3a1	118.27	14.7791
ILMN_1238433	Rbp1	119.57	25.3733
ILMN_2451013	Ccnyl1	119.67	19.4417
ILMN_2543688	LOC100616095	119.92	19.1415
ILMN_2665229	Rpl11	121.59	14.9599
ILMN_2457437	AK083579	122.26	19.2661
ILMN_2881322	Rpl18	127.26	16.1656
ILMN_2755511	Piezo1	131.07	17.8904
ILMN_1229553	Igsf3	131.41	18.7967
ILMN_1254630	Ptpre	132.35	16.6013
ILMN_2515022	Uba52	135.69	14.5295
ILMN_1219077	Mprip	137.37	15.639
ILMN_2744693	Ufc1	137.4	15.0936
ILMN_2998934	Cited4	147.1	4.93083
ILMN_1234614	Prps2	147.41	5.13474

## Sheet: N4
Probe_ID	Gene_symbol	Average_rank	sd
ILMN_2588052	Eef1a1	2.62	2.2055
ILMN_2801683	Dstn	4.88	3.49395
ILMN_1242617	Lpar4	6.45	4.06854
ILMN_2998173	Gm6548	7.57	6.62907
ILMN_2734391	Ramp1	12.15	7.78288
ILMN_1226839	Hist1h2ae	13.27	11.6158
ILMN_1222315	Chsy1	16.36	12.326
ILMN_1251595	Bhlhb9	17.18	10.8165
ILMN_2748402	Col5a1	18.35	10.6594
ILMN_2851875	Actr3	19.93	14.5354
ILMN_2515784	Tspan6	23.88	12.2188
ILMN_1238276	Hist1h2ai	23.96	11.2528
ILMN_2665387	Coro1c	24.72	15.4162
ILMN_2935362	Ywhab	27.2	29.2205
ILMN_1234453	Rbm3	28.28	16.7254
ILMN_2776025	Fkbp1a	28.44	17.4381
ILMN_1220243	Phldb2	28.71	15.9718
ILMN_1240726	Mmp14	29.16	18.3213
ILMN_2914744	Hn1	30.06	20.3866
ILMN_1218380	Hist2h2ac	30.57	13.3494
ILMN_2790373	Snn	33.01	16.2391
ILMN_2836654	Hist1h2ao	34.5	20.2552
ILMN_3053593	Glipr2	35.1	16.6014
ILMN_2883392	S100a11	35.15	20.3407
ILMN_1217879	Erh	37.81	27.6141
ILMN_2648292	H3f3b	38.65	19.6856
ILMN_2621544	Nid2	39.25	26.7515
ILMN_2936351	Matr3	39.41	20.1244
ILMN_2873510	Ppp4r1	39.97	28.8705
ILMN_1250438	Marcksl1	40.03	22.5346
ILMN_2616709	Nisch	40.36	23.0035
ILMN_2674367	Agrn	42.29	26.1983
ILMN_1250815	Wsb1	42.73	18.2313
ILMN_1251930	Nasp	44.16	31.9212
ILMN_2916705	Tuba1a	46.76	25.5751
ILMN_2595714	Fn1	47.49	28.6982
ILMN_2733524	Nrm	48.52	17.7135
ILMN_1220360	Unc13b	50.27	24.274
ILMN_1258658	Tnks	50.38	21.5827
ILMN_2683916	Eif1ad	50.61	23.622
ILMN_2664972	Mapre1	50.9	20.9904
ILMN_1237233	Cnot6	50.99	29.4431
ILMN_1260420	Suv420h2	51.55	23.5957
ILMN_2746132	Fnbp1l	53.57	23.1814
ILMN_3158499	Mdk	54.92	28.3808
ILMN_1245757	Nans	55.07	23.2411
ILMN_1252136	Hist1h2af	57.48	36.5258
ILMN_2449120	2014-09-11	57.86	28.9699
ILMN_1235811	Fam198b	58.78	28.0384
ILMN_2438771	Fubp3	61.09	35.1333
ILMN_2836312	Podxl2	61.19	32.1671
ILMN_2942499	Rbm5	63.29	34.2369
ILMN_2637266	Casp2	64.01	33.5136
ILMN_2793946	Csnk1g3	64.26	25.2829
ILMN_1241278	Rdh11	64.52	29.1449
ILMN_2751037	Spata13	65	28.4403
ILMN_2936427	Mcm4	66.39	26.3948
ILMN_3000108	Lsm6	66.72	33.406
ILMN_2848273	Mansc1	66.97	26.4817
ILMN_1259610	Cd276	67.96	24.7664
ILMN_1235500	Il4i1	68.65	36.0489
ILMN_2903511	Lsm4	69.86	25.8355
ILMN_2433047	Rnf26	70.11	25.7917
ILMN_2721439	Csrp2	70.73	32.8691
ILMN_2740852	F2r	71.01	39.4918
ILMN_2611728	Srsf6	72.45	27.729
ILMN_2934120	Hist2h3c1	74.73	24.7675
ILMN_2741132	Hmgn1	75.19	25.9618
ILMN_2776419	Dynll1	75.29	36.2503
ILMN_1221067	Nme1	75.91	24.8576
ILMN_2644632	Stxbp1	76.23	31.6042
ILMN_2589741	Tmem51	77.68	42.8379
ILMN_2842877	Pja1	79.25	38.8401
ILMN_1252479	Gm10348	80.9	25.9862
ILMN_2955919	Mcam	82.01	35.6854
ILMN_1230893	Farp1	82.37	28.7404
ILMN_1248608	Shroom2	82.68	32.2242
ILMN_1216792	AK078510	83.58	35.0775
ILMN_3140788	Ptbp1	85.31	27.6013
ILMN_2693895	Acta2	85.67	43.6011
ILMN_2514292	Zyx	85.96	28.16
ILMN_1227164	Tubb5	86.7	37.3245
ILMN_2428388	Wdr76	86.86	38.0061
ILMN_2821092	Stx5a	88.9	50.4588
ILMN_2790399	Pan2	88.99	46.7074
ILMN_2709470	Degs1	90.02	31.0073
ILMN_2724294	Gpx7	90.21	30.497
ILMN_1244715	Atcayos	94.99	30.7983
ILMN_2775937	Plat	98.09	49.5552
ILMN_1217039	Vwa9	98.39	23.9802
ILMN_2626190	AK088388	99.04	35.8411
ILMN_1234742	Armcx3	99.35	42.7408
ILMN_2757916	Armc10	100.64	36.3936
ILMN_2660862	Sepn1	102.09	31.6081
ILMN_2833606	Ssr2	102.38	32.0302
ILMN_2447875	AK031957	102.54	41.9989
ILMN_1222447	Srsf9	102.76	30.9725
ILMN_1224719	Rpl29	102.77	27.354
ILMN_2423789	Sae1	102.89	33.6602
ILMN_2599618	Morf4l2	104.41	33.8114
ILMN_1221257	BC026585	104.67	38.8793
ILMN_2697304	Eln	104.7	30.8275
ILMN_2591814	Srsf1	105	32.4644
ILMN_2726325	Cetn3	105.12	52.8568
ILMN_1226114	Myh10	106.86	45.8066
ILMN_3006643	Abi2	107.36	43.0932
ILMN_1228245	Prickle1	107.53	34.6094
ILMN_2703913	Mtf2	108.33	35.8239
ILMN_1248854	Ick	108.82	41.393
ILMN_2648967	Arrdc4	110.71	39.705
ILMN_2921103	Hnrnpm	111.04	27.2923
ILMN_1249374	AK084903	111.53	32.5218
ILMN_2930819	Acd	113.22	37.2563
ILMN_2777804	Arid2	113.64	36.0559
ILMN_2629648	2410002F23Rik	113.79	36.1141
ILMN_1217817	AK134382	116.29	32.061
ILMN_2734683	Fstl1	116.73	43.9951
ILMN_2657376	Nipsnap3b	116.74	35.87
ILMN_2636335	Srsf2	116.94	38.0852
ILMN_2743425	Arfip1	117.62	33.7937
ILMN_1227699	Tspan18	117.96	36.4453
ILMN_3109491	Irf2bpl	119	36.3059
ILMN_1248132	Stmn1	120.02	33.1239
ILMN_1231164	Zfp810	120.46	42.9969
ILMN_1259470	Tmem176b	121.03	28.3654
ILMN_2759285	Thsd1	121.53	31.6022
ILMN_1250068	Atpif1	122.79	35.3994
ILMN_2723293	Smtnl2	123.55	38.6459
ILMN_2750801	Rpa1	125.58	54.5181
ILMN_2492292	Adnp	125.84	33.5916
ILMN_2925974	Zcchc8	126.72	37.0498
ILMN_2732848	Tagln2	127.06	29.2657
ILMN_1254256	Actl6a	128.43	34.5634
ILMN_2627690	Hnrnpl	129.06	35.5289
ILMN_1253412	Gpatch8	129.25	33.7712
ILMN_2998395	Zfp523	130.92	30.8249
ILMN_2595774	Mta2	132.73	37.8148
ILMN_1213609	Txnip	133.6	37.0059
ILMN_1221624	Slc35b3	133.78	27.8766
ILMN_2589640	Ednrb	134.37	31.5107
ILMN_1253986	Dlg5	135.61	39.4531
ILMN_1245994	Flna	136.49	31.9604
ILMN_1257724	Adamts9	137.04	33.9408
ILMN_1240770	Acly	137.98	37.141
ILMN_2859978	Papss1	138.34	38.6155
ILMN_2632092	Ppp1r9a	139.79	31.2795
ILMN_2834728	Prkd3	140.77	45.8951
ILMN_1229682	Commd7	141.16	39.627
ILMN_2595200	Cxx1c	142.23	32.7707
ILMN_2472444	Traf4	143.51	26.0948
ILMN_2752234	Krba1	143.54	29.1615
ILMN_2939367	Zfp608	143.77	44.6107
ILMN_2419138	Vcl	144.02	36.651
ILMN_1254253	Kdm1a	144.34	30.3376
ILMN_2592253	Hist1h3g	147.53	35.3583
ILMN_2861331	Pnrc2	147.55	44.3452
ILMN_2491831	Purb	148.02	25.4447
ILMN_1225035	Carhsp1	148.38	34.885
ILMN_3115490	Rtn1	148.64	57.1798
ILMN_1227212	2810403A07Rik	148.91	26.1781
ILMN_2763103	Arf6	149.23	32.0753
ILMN_1227722	Tgfb1i1	149.9	46.7204
ILMN_3007072	Tpm1	150.68	36.287
ILMN_2595967	Rpl35a	151.65	39.9415
ILMN_2513778	Tmc6	151.88	32.7702
ILMN_2529395	Fbxo10	151.99	25.3801
ILMN_2611180	Ccdc3	152.91	21.8239
ILMN_2523012	Meg3	153.01	28.0575
ILMN_2960822	BC085271	153.28	43.6145
ILMN_3157568	Bcl2l11	156.3	30.0862
ILMN_2726515	Mbtd1	158.34	35.0913
ILMN_2602858	Plp2	158.92	33.8773
ILMN_2601865	Mrpl52	159.99	39.6611
ILMN_3163027	Abhd17a	160.56	26.6766
ILMN_2996683	Pvrl2	161.05	36.7933
ILMN_2674575	Mmd	166.06	28.1568
ILMN_2631098	Msh6	166.47	32.2999
ILMN_2740432	Rpl10	167.22	22.8851
ILMN_1237330	Rnf207	167.5	25.0976
ILMN_2622560	Chkb	168.35	26.303
ILMN_1248759	Slc25a4	168.77	37.5986
ILMN_2670895	Ddx39b	169.39	19.4749
ILMN_2630605	Fscn1	169.81	38.8295
ILMN_1220430	Ccdc28b	170.19	33.5555
ILMN_1250704	Rcsd1	170.62	35.4206
ILMN_1232495	Ezr	170.68	32.1203
ILMN_2695217	Fam76b	171.18	23.8355
ILMN_1218571	Dhx15	171.56	20.6981
ILMN_2909105	Fam57a	172.1	29.8564
ILMN_1223097	Nt5c	172.44	38.3715
ILMN_1219893	Ctdspl2	172.9	21.7388
ILMN_1252263	AK017907	173.95	28.0963
ILMN_1214563	Synpo2l	175	21.528
ILMN_2949596	Dpysl2	175.78	18.5737
ILMN_2624749	Ankrd10	175.93	23.9837
ILMN_3009685	Ptprs	176.69	24.6817
ILMN_2655577	Pold1	176.94	27.4847
ILMN_2968479	Hmg20a	181.05	28.5184
ILMN_2593230	Mllt4	183.61	31.6524
ILMN_2694381	Dnajc7	188.22	26.089
ILMN_1256702	S100a10	188.91	16.7024
ILMN_2723881	Hcfc1	189.6	21.994
ILMN_1215530	Ccnt2	198.94	7.40437
ILMN_2721198	Ggnbp1	199.5	9.66562
ILMN_2669699	Tma7	202.835	19.0532
ILMN_3163159	Gng5	203.01	7.18935
ILMN_1246153	Erdr1	204.865	5.30049

## Sheet: J1
Probe_ID	Gene_symbol	Average_rank	sd
ILMN_2822552	Ubtd2	3.93	3.3462
ILMN_2679037	Cmtm3	5.2	3.96449
ILMN_2792809	Arpc5	9.14	7.88045
ILMN_2772155	Adam19	9.33	6.46366
ILMN_2837543	Nras	12.47	8.37439
ILMN_2731454	Evl	13.67	10.9444
ILMN_2600565	Maged2	14.14	8.17859
ILMN_2694275	Lxn	15.39	9.44617
ILMN_2661422	Ramp2	16.25	11.5482
ILMN_2498851	Pxdn	18.92	11.1216
ILMN_2519676	Triobp	21.45	15.4118
ILMN_2665490	Litaf	21.69	10.3012
ILMN_1258587	AK007736	22.43	13.763
ILMN_1229547	Spon2	23.08	14.0156
ILMN_2753687	Arhgap29	24.12	13.602
ILMN_2974021	Rpl3	24.89	15.9202
ILMN_2515363	Tpm4	25.95	17.8158
ILMN_2618634	Sptan1	27.04	17.45
ILMN_2615901	Ptk2	27.26	17.0469
ILMN_1221503	Ccnd1	28.69	20.3627
ILMN_2828427	Llgl1	29.02	15.4541
ILMN_2596917	Nck2	29.72	12.6452
ILMN_1248002	Arhgap18	30.07	18.273
ILMN_2424268	Wtip	30.88	14.1137
ILMN_2582952	AF217545	31.03	23.3703
ILMN_1259482	Pabpc1	31.37	17.2074
ILMN_2589785	Cnn3	31.48	15.1481
ILMN_1230423	Sh3pxd2b	31.78	19.9487
ILMN_1241168	Dok4	31.9	14.4064
ILMN_2631518	Serf1	32.23	14.2721
ILMN_1238592	Plekhh1	33.1	13.407
ILMN_2517611	AK082138	33.74	16.1237
ILMN_2638114	Ptn	34.49	13.4821
ILMN_2635229	Thbs2	36.2	16.6951
ILMN_2642913	Emp1	37.19	16.0647
ILMN_2470646	Wt1	37.91	19.7121
ILMN_2591425	Gucy1a3	38.14	15.7769
ILMN_2770183	Ddah2	38.8	17.3549
ILMN_2752275	Gjd3	39.43	19.3376
ILMN_1217309	Tax1bp3	39.73	16.5156
ILMN_2684279	Edem2	40.13	15.6351
ILMN_1224607	Vash1	41.81	24.6436
ILMN_3119014	Elk3	42.31	16.8107
ILMN_3095462	Mfap3	43	15.5719
ILMN_2750588	Tmem132a	44.15	20.875
ILMN_2618408	Icam2	46.02	17.4118
ILMN_2632665	Cav1	46.79	16.3869
ILMN_2835686	Ywhaq	47.61	20.2374
ILMN_1258688	Nptxr	47.99	22.1448
ILMN_1231896	Ssbp4	48.48	18.3905
ILMN_2737704	Gja4	48.96	17.8783
ILMN_2788546	Coro1b	50.51	16.3747
ILMN_3084954	Tes	52.5	18.3927
ILMN_1241171	Anxa3	53.87	14.9367
ILMN_2914510	2014-09-02	55.73	16.0918
ILMN_2663805	Map4k3	57.84	14.4661
ILMN_1213426	Fam134a	59.1	21.3752
ILMN_2706268	Scara3	59.43	20.1139
ILMN_2755660	Ptma	59.99	16.2918
ILMN_2768831	Siah1a	60.43	28.4829
ILMN_2676127	Scarf2	60.94	23.5821
ILMN_1239211	Rpl5	60.96	21.1507
ILMN_2612513	Strip1	61.06	28.6944
ILMN_1258988	Igfbp4	61.66	16.0355
ILMN_2603725	Arpc3	62.52	22.424
ILMN_2544056	Hbb-b2	62.73	16.7138
ILMN_2430813	Pdlim7	62.74	15.3265
ILMN_1213781	Rpl17	62.77	11.5836
ILMN_2619107	Lgals1	63.11	18.1842
ILMN_2890357	Eva1b	64.95	17.4271
ILMN_2495289	Slc35b2	66.06	20.8132
ILMN_1245092	Ppib	67.89	13.1563
ILMN_2956942	Prkcdbp	68.23	25.115
ILMN_1239603	Zdhhc4	68.38	16.4524
ILMN_2623216	Pgrmc1	70.44	16.7135
ILMN_2915232	Cotl1	71.25	12.1675
ILMN_2595973	Grn	71.54	27.6049
ILMN_2698958	Arpc2	74	12.8888
ILMN_2955104	Naca	74.68	18.4533
ILMN_2482571	Flnb	75.6	13.3007
ILMN_1228485	Csnk2a2	76.76	13.1365
ILMN_1236624	Ap3s1	78.55	14.4875
ILMN_2738156	Zfp362	80.12	15.7154
ILMN_3023230	Kdm6b	80.47	16.1548
ILMN_2806159	Tmsb4x	81.6	19.9757
ILMN_1219016	Wwtr1	82.3	14.0565
ILMN_1240994	Esyt1	83.33	12.6052
ILMN_2523316	Unc5b	83.41	25.2899
ILMN_2465338	Pigt	83.84	15.2942
ILMN_2636212	Sh3bgrl	84.46	12.5878
ILMN_1222489	Sulf1	85.38	14.7503
ILMN_2578681	AK081831	85.65	24.2239
ILMN_3123889	Zfp277	88.34	13.2453
ILMN_2883016	Nav1	88.53	17.2161
ILMN_2736038	Cgnl1	88.83	11.968
ILMN_2860479	Arpc1b	91.21	16.3585
ILMN_1245504	Hmgb1	91.39	12.727
ILMN_3136638	Snca	92.11	11.4114
ILMN_3005873	Sort1	92.86	14.2446
ILMN_2762935	Rhox5	94.5	8.57822
ILMN_2595846	Surf4	94.79	11.492
ILMN_2422333	Trap1	95.27	12.5415
ILMN_1252831	Ppp1r18	95.4	10.1125
ILMN_2675874	Alas2	98.14	9.31711
ILMN_1255207	Pde8a	100.34	7.48766
ILMN_2514522	AK142645	100.52	7.32297
ILMN_2672626	Myh9	103.13	5.53894
ILMN_2653567	Rhoj	103.36	8.10975

## Sheet: J2
Probe_ID	Gene_symbol	Average_rank	sd
ILMN_2678127	Rnf144a	3.94	3.71951
ILMN_2690839	Esam	6.45	4.06357
ILMN_1237583	Galnt16	6.6	5.44949
ILMN_2594714	Ets2	8.33	5.65695
ILMN_1255385	Chst1	11.27	6.85912
ILMN_1246821	Vstm4	11.88	9.49458
ILMN_2615431	Tril	12.77	12.2778
ILMN_1241293	Cldn5	13.06	9.27669
ILMN_2703267	Nes	13.31	8.28251
ILMN_1258629	Col3a1	13.71	9.93849
ILMN_3163288	Egfl7	14.22	9.07275
ILMN_2908687	Rasgrp3	15.7	11.4984
ILMN_2804444	Pcdh17	17.11	8.18954
ILMN_2774596	Lamc1	17.86	10.5935
ILMN_2596979	Nrarp	21.63	8.78895
ILMN_2645321	Sox18	23.07	16.8507
ILMN_1225414	Rab5c	23.11	11.1997
ILMN_1212653	Rftn2	24.99	15.5878
ILMN_2700408	Mgll	25.3	11.3186
ILMN_2740217	Rasip1	25.73	11.4864
ILMN_1216374	Chst7	26.04	13.6803
ILMN_1221199	Ppm1f	26.43	10.4941
ILMN_1259949	Arhgef25	27.39	13.4787
ILMN_1243107	Arap3	27.74	14.4946
ILMN_2736153	Map3k11	29.31	11.5834
ILMN_2607529	Nr2f1	29.36	12.8994
ILMN_1243249	AK189470	30.48	12.289
ILMN_2658407	Elmo1	35.14	17.7917
ILMN_1229714	Col14a1	35.4	17.0146
ILMN_1220697	Notch4	36.45	21.2795
ILMN_1254341	Rsu1	36.9	12.7584
ILMN_1223552	Fbn1	37.06	16.3156
ILMN_2544890	AK171700	38.64	17.1273
ILMN_1242309	Dennd6a	40.3	15.4962
ILMN_2709087	Meox2	40.98	12.5247
ILMN_2461898	Tet2	41	13.3311
ILMN_2885277	Nnmt	41.54	11.5255
ILMN_2889482	Sox7	42.11	18.056
ILMN_2790357	Sema7a	42.41	19.4163
ILMN_3112219	Mlf1	43.01	15.4812
ILMN_2665008	Rab31	43.29	20.3307
ILMN_2714360	Cd34	43.38	15.431
ILMN_2614842	Gpihbp1	44.43	15.9565
ILMN_1213848	Asap2	44.52	10.5414
ILMN_1220293	Gpc6	44.53	16.4749
ILMN_1245119	Pcdh12	44.7	16.7426
ILMN_3157483	Ets1	45.5	14.1596
ILMN_1215203	Frmd4a	46.6	25.1288
ILMN_2622983	Dusp1	47.11	17.3583
ILMN_2611767	Gprc5b	47.28	15.8943
ILMN_1260448	Plk2	47.62	17.7734
ILMN_1216116	Smarcd2	48.11	17.059
ILMN_1229741	Rap1b	50.2	12.7049
ILMN_1248099	Col16a1	52.04	18.4286
ILMN_1255871	Loxl1	52.62	13.8007
ILMN_2731949	Klf6	53.12	16.8932
ILMN_2500370	Map4k4	54.83	13.0539
ILMN_2953700	Smad1	54.87	18.1896
ILMN_1224859	Gimap6	55.14	20.4332
ILMN_2879588	Lhfpl1	55.76	19.4719
ILMN_1244291	Gja1	56.13	19.5777
ILMN_2989955	mKIAA4159	56.6	19.5148
ILMN_2675697	Kdelr3	57.07	18.8075
ILMN_2656422	BC028528	58.05	14.7623
ILMN_2729197	Hic1	62.17	21.785
ILMN_2616989	Kctd17	62.46	10.6082
ILMN_1232182	Ctnnbip1	62.72	16.0555
ILMN_2665545	Rin3	62.87	14.4023
ILMN_2609998	Fxyd6	63.54	14.3516
ILMN_1213886	Meox1	63.71	12.6142
ILMN_2642681	Atf4	65.82	12.3994
ILMN_2606210	Dpt	67.01	11.449
ILMN_2896843	Cd248	67.11	10.9857
ILMN_1237917	Sparcl1	67.86	12.49
ILMN_2432110	AK036932	68.14	19.7285
ILMN_2690596	Hey1	68.59	13.4443
ILMN_2614380	Map3k1	70.84	18.1374
ILMN_1231506	Cnrip1	72.65	12.0272
ILMN_1259559	H1f0	73.53	13.1521
ILMN_2764588	Igfbp7	74.08	13.7618
ILMN_1217408	Prkacb	74.96	16.89
ILMN_2632509	Ppp1r14c	75.7	18.0003
ILMN_1253602	4930523C07Rik	77.35	10.1368
ILMN_2777359	Serpinh1	78.08	9.74076
ILMN_2680781	Arl8a	78.57	12.2435
ILMN_2706587	Tjp1	79.16	15.1162
ILMN_2651077	Shisa5	82.12	6.53395
ILMN_1254307	1810011O10Rik	84.82	7.67441
ILMN_1213708	Auts2	85.24	4.72928
ILMN_2829262	Ltbp4	85.61	4.49443
ILMN_2588139	H2-K2	90.74	2.18983
ILMN_1219978	Appl2	91.32	1.29981

## Sheet: J3
Probe_ID	Gene_symbol	Average_rank	sd
ILMN_2680054	Nrep	4.49	3.53766
ILMN_2639155	Prcp	5.18	6.07592
ILMN_2599659	Fmnl3	6.01	4.47551
ILMN_2925711	Dusp6	6.38	5.04281
ILMN_2879746	Lasp1	9.85	5.98884
ILMN_2625920	Aoc3	9.97	6.03768
ILMN_2429800	Tnfaip1	10.15	7.97138
ILMN_2432550	Trib2	11.27	7.45472
ILMN_2810882	Ppic	13.92	7.15158
ILMN_1246876	Kit	17.97	10.9327
ILMN_2866189	Btg1	18.24	11.8766
ILMN_2498471	Ptrf	19.54	11.764
ILMN_1226329	Cd93	20.04	10.5389
ILMN_1235619	Wasf2	22.12	11.4383
ILMN_1256142	Marcks	22.18	14.393
ILMN_1226754	Phc2	24.34	16.1759
ILMN_2760963	Dock6	24.43	11.181
ILMN_1214608	Plxnd1	26.52	12.0239
ILMN_2449396	Gli3	27.73	17.9803
ILMN_2686975	Fam129b	28.95	13.9938
ILMN_1257666	Tspan14	30.42	13.6819
ILMN_2422615	Ebf3	30.71	11.8869
ILMN_1257333	2310022B05Rik	30.72	14.8331
ILMN_2612448	Nfat5	30.89	13.6159
ILMN_3154820	St5	31.16	15.512
ILMN_1256121	Zfp282	31.88	12.1649
ILMN_1244123	Slc38a2	32.47	16.6135
ILMN_2771550	Cdh5	32.74	15.1181
ILMN_2778151	Sox9	33.12	16.5958
ILMN_2621643	Col4a1	34.79	12.7741
ILMN_3070389	ENSMUSG00000068790	36.69	13.0436
ILMN_2657467	Nsmf	36.85	19.393
ILMN_1239041	Mtch1	37.59	16.6722
ILMN_1253625	BC079836	37.89	14.6238
ILMN_1213985	2810025M15Rik	38.58	16.5561
ILMN_1250766	Pvrl3	38.79	20.1917
ILMN_1259946	Cdc42se1	38.91	16.9712
ILMN_1226546	Iffo2	38.94	16.4831
ILMN_1222231	Brd3	39.59	14.5256
ILMN_2957070	Shc1	40.49	21.3884
ILMN_1214671	Cdca4	40.68	14.0834
ILMN_1257579	Nup210	42.86	19.4557
ILMN_1222674	Smap1	42.94	20.0816
ILMN_2445324	Zfpm1	43.02	16.5804
ILMN_2474052	Cdk6	43.15	18.8441
ILMN_1234672	Ddx17	43.9	15.1694
ILMN_2738054	Plekhg2	44.93	19.0757
ILMN_1250752	Kif23	45.55	16.443
ILMN_2824593	Kbtbd2	45.91	20.4915
ILMN_2717176	Rgl1	45.95	14.5167
ILMN_1241915	Notch1	49.59	20.5677
ILMN_2822579	Col4a2	50.48	14.5168
ILMN_2780424	Zfp36l1	51.19	16.2274
ILMN_2698589	Cstf2	52.64	22.3844
ILMN_1257291	AK050884	53.84	23.4541
ILMN_2963483	Kank3	54.1	12.6926
ILMN_2717011	Bik	55.53	15.6169
ILMN_2700982	Pecam1	56.16	17.0458
ILMN_2601441	4931406P16Rik	56.82	12.8199
ILMN_2788593	Nos3	57.23	19.3906
ILMN_2976120	Ist1	58.34	15.8428
ILMN_2640542	Colec11	59.66	12.227
ILMN_1228850	Ccnl1	60.01	22.3627
ILMN_2792601	Lpar6	62.2	12.2351
ILMN_2624622	Akap12	63.15	17.78
ILMN_1260020	Pcdh1	63.25	9.96192
ILMN_1260372	Pald1	63.29	13.2964
ILMN_3136561	Sparc	63.52	19.1018
ILMN_2768087	Col6a1	63.81	17.6959
ILMN_1224318	Kctd3	64.5	18.2522
ILMN_2901284	Add3	66.98	22.6871
ILMN_2733185	Cdc42ep3	66.99	20.9653
ILMN_2764781	Pls3	68.99	21.0783
ILMN_1255473	Txndc12	69.91	13.9907
ILMN_2647563	Snai2	70.74	17.5877
ILMN_1229743	Mapre2	71.52	15.0464
ILMN_2584490	Fam178a	71.62	15.681
ILMN_2981363	Emilin2	71.72	13.5811
ILMN_2898319	Aldh1l2	71.88	26.044
ILMN_2751854	Ndrg4	71.89	14.9199
ILMN_2791746	Cyth3	72.83	15.3202
ILMN_2636463	Tcf4	75.48	11.9886
ILMN_1216661	Col6a2	76.16	10.038
ILMN_1236906	Cdkn2aipnl	76.25	12.1142
ILMN_2443618	2900026A02Rik	77.44	20.4595
ILMN_2602185	Sept9	80.25	11.0521
ILMN_2685329	Hspg2	80.91	13.6471
ILMN_2595732	Nfil3	82.43	17.7595
ILMN_1239857	Extl3	84.47	10.8091
ILMN_2734712	Ptpla	85	7.89834
ILMN_2697380	Notch3	85.1	7.02736
ILMN_2655260	Ptp4a3	85.4	5.67468
ILMN_2790097	Rhoc	85.8	8.20938
ILMN_2814005	Nid1	89.58	8.77805
ILMN_2437848	Col4a5	89.96	10.6172

## Sheet: J4
Probe_ID	Gene_symbol	Average_rank	sd
ILMN_2629764	Bcl6b	2.61	1.51687
ILMN_2942011	Robo4	3.4	2.28743
ILMN_2662926	Egr1	3.9	3.24582
ILMN_2618714	Pdgfb	5.17	2.87818
ILMN_2748850	Aplnr	6.19	3.05735
ILMN_2421549	Nav3	6.82	3.22672
ILMN_1259400	Lsp1	8.61	4.04743
ILMN_2646296	Lurap1l	9.89	4.18727
ILMN_2646625	Jun	10.48	3.78855
ILMN_1230357	Itpr1	10.79	5.80542
ILMN_2903945	Gadd45g	14.11	5.42515
ILMN_2633350	Mfap4	14.44	7.13693
ILMN_1225835	Mfap5	16.84	7.21211
ILMN_1215212	Rhob	16.87	6.31921
ILMN_2604029	Klf2	17.77	7.31659
ILMN_2836749	Rasl12	19.32	11.46
ILMN_2794645	Cyr61	20.58	9.54117
ILMN_1230765	Tpst1	21.47	9.19316
ILMN_1222261	Gon4l	21.89	9.11198
ILMN_1213954	Sgk1	22.68	9.05637
ILMN_1216322	Hmgcs2	23.04	8.86705
ILMN_1257209	Wipf1	24.47	6.18642
ILMN_2774854	Lpar1	25.43	7.53209
ILMN_1232766	Sccpdh	27.07	9.40799
ILMN_2757232	Aqp4	27.09	9.73497
ILMN_2906855	Ky	27.16	7.67222
ILMN_2668696	Il13ra1	27.57	8.88678
ILMN_1223285	Hspa2	28.96	9.97463
ILMN_2860804	Tfrc	29.51	8.85175
ILMN_2894211	8430408G22Rik	30.46	10.5815
ILMN_2714031	Errfi1	32.8	11.9426
ILMN_1242427	Itga9	33	7.62505
ILMN_2759079	Ppap2a	33.4	8.98933
ILMN_1259022	Etl4	34.38	7.80026
ILMN_1251119	Bmpr1a	34.56	8.37302
ILMN_1232458	C1qtnf2	34.65	6.47509
ILMN_1220034	Junb	34.68	7.94155
ILMN_2737713	Edn1	34.71	8.98966
ILMN_2776278	Ly6e	36.15	9.57203
ILMN_2968211	Lgals4	37.8	8.01514
ILMN_2909150	Ctgf	39.3	11.3942
ILMN_2637757	Hlx	39.86	7.6884
ILMN_1259322	Pdk4	40.13	8.56072
ILMN_1249220	Col6a3	40.2	8.89331
ILMN_1225204	Rsad2	40.44	8.15917
ILMN_2634338	Sptssa	40.49	7.2132
ILMN_2687169	Id3	41.54	10.7181
ILMN_3162407	Zfp36	43.57	11.6222
ILMN_1222111	Col15a1	44.17	5.94768
ILMN_2677882	Tanc1	44.27	9.21445
ILMN_2901626	Tnfrsf21	44.39	5.56848
ILMN_1215446	Cidea	48.92	6.25014

## Sheet: A1
Probe_ID	Gene_symbol	Average_rank	sd
ILMN_2649810	Rpl3l	6.45	4.82287
ILMN_2698052	Ckmt2	6.69	4.97406
ILMN_2669088	Dnajc21	7.78	5.87338
ILMN_2470889	Sdr39u1	9.43	6.77675
ILMN_2761205	Hspb8	11.88	8.27956
ILMN_2682046	Myl12a	12.61	10.0734
ILMN_2887065	Mvp	13.55	7.0716
ILMN_1254878	Eif4e3	16.86	12.1921
ILMN_1244024	Cebpg	17.48	10.4529
ILMN_2739698	Rab28	18.35	11.1558
ILMN_2858399	Fitm2	18.36	12.2016
ILMN_2706205	Cisd1	22.25	13.9837
ILMN_1234388	Twf2	22.46	11.8785
ILMN_3064283	Pde4dip	23.22	13.5993
ILMN_2945483	Csde1	23.54	11.8317
ILMN_2848163	Rilpl1	24.24	11.9486
ILMN_2619204	Fbxo40	25.7	14.2485
ILMN_1241151	Lrtm1	27.36	16.5953
ILMN_2683986	Macrod1	28.17	17.4565
ILMN_2805339	Hspb6	28.61	13.6536
ILMN_2693185	Ddo	28.83	21.2151
ILMN_2689986	Dnaja4	28.91	18.8937
ILMN_3153982	Nacc2	31.59	12.6867
ILMN_1228298	Fbxo3	32.39	15.3898
ILMN_3123836	Nudt7	32.61	14.619
ILMN_2664129	Hist1h4h	33.96	17.8857
ILMN_2666018	Mgp	34.4	18.4495
ILMN_1212605	1500011K16Rik	35.75	16.3277
ILMN_2666272	Hemk1	38.49	25.8044
ILMN_2711045	Sirt5	38.63	20.5464
ILMN_2624145	Mtfp1	39.21	20.589
ILMN_1256369	Lynx1	39.44	18.1677
ILMN_1237208	Lamp1	40.56	31.8301
ILMN_2687745	Pnpla2	41.43	15.3717
ILMN_2608238	Dnaja3	41.47	21.1424
ILMN_1226195	Bag3	43.65	18.5806
ILMN_1235070	Nrap	44.14	15.9924
ILMN_2625280	Grb14	44.63	26.2389
ILMN_1241773	Ldb3	44.83	22.404
ILMN_2628603	Limch1	45.39	30.9274
ILMN_2752074	Ppm1b	46.12	21.5797
ILMN_2748941	Itfg3	46.53	24.7556
ILMN_2419748	AK051059	46.65	19.1361
ILMN_2766727	Chrm2	46.71	18.5229
ILMN_2422014	AK021294	47.9	25.067
ILMN_1240857	Cox7a1	48.73	16.0899
ILMN_1253773	Nudt6	48.85	22.4775
ILMN_1225723	Osgepl1	48.92	21.851
ILMN_2748222	Tesc	50.59	20.0686
ILMN_1220560	Pgm5	52.97	21.149
ILMN_2799667	Apmap	54.75	36.9103
ILMN_2722716	Atp1a2	54.89	31.8861
ILMN_1254786	Ech1	55.46	21.4167
ILMN_1239386	Galnt15	56.79	24.2405
ILMN_2660110	Apba3	57.18	22.4303
ILMN_1255416	Ly6a	59.1	18.2748
ILMN_2727992	Mrpl42	59.76	23.0433
ILMN_2638889	Nol3	59.81	17.0304
ILMN_2739544	Stc2	61.9	24.0288
ILMN_2654074	Sesn1	62.45	22.6048
ILMN_1216007	Ndufa5	62.64	15.9529
ILMN_2707494	Mcee	64.64	31.6089
ILMN_2804523	Dusp7	65.7	23.282
ILMN_1212801	AK048039	65.9	22.6606
ILMN_2699488	Lamb2	68.87	33.7291
ILMN_2776600	Psap	69.56	23.9871
ILMN_2628892	Pfkm	70.17	17.0904
ILMN_2949021	Nceh1	71.68	18.3082
ILMN_2789650	Csrp3	72.78	21.9207
ILMN_3124037	Kcnip2	75.81	20.9654
ILMN_2596007	Phospho2	75.87	27.6291
ILMN_2742599	Nfix	76.01	23.4532
ILMN_2833596	Abcb6	76.89	22.6653
ILMN_2636443	Bcl2l2	77.25	40.2011
ILMN_1229971	Vezf1	77.74	49.1425
ILMN_2659644	Map2k3	77.81	19.4301
ILMN_2605790	Lmod3	80.47	26.7002
ILMN_1223147	Art3	81.69	29.0269
ILMN_2973824	Car14	82.25	16.9237
ILMN_1250904	Rtn2	82.95	23.9766
ILMN_1232901	Vamp5	83.61	23.962
ILMN_3130768	Ccser2	84.26	29.3552
ILMN_2459899	Adamtsl4	84.45	18.3987
ILMN_2870522	Plekha6	86.21	40.4683
ILMN_2602821	Cdk5rap1	86.79	25.4575
ILMN_1231340	Myadml2	88.53	25.3367
ILMN_1253191	AK046642	88.65	29.4969
ILMN_1214163	Fam63b	89.82	19.9931
ILMN_1221142	Ppard	90.09	21.8503
ILMN_1226216	Rnf123	91.58	21.359
ILMN_2594718	Adam17	91.8	25.6574
ILMN_2688607	Pptc7	93.96	32.0523
ILMN_1257880	Itga7	94.06	27.5633
ILMN_2706567	Spop	94.72	22.5582
ILMN_1257428	Fkbp4	96.52	35.8967
ILMN_1247592	Casp1	97.53	26.5636
ILMN_1238713	Wdr33	99.53	21.0773
ILMN_1228288	AK038731	100.41	16.9146
ILMN_3156208	Gpr146	101.44	34.8672
ILMN_2991912	Rab3a	101.65	23.4759
ILMN_2613869	Clpx	102.44	31.3028
ILMN_2463616	Map7	102.47	29.9064
ILMN_2517060	Tmem64	103.65	24.2184
ILMN_1217943	Cab39l	104.31	38.6877
ILMN_2688763	Ndufs7	104.76	32.2791
ILMN_1233987	AK003718	105.09	20.1605
ILMN_1215096	Entpd5	106.68	29.0732
ILMN_2470039	BC090994	107.36	35.9412
ILMN_2710819	Csf1r	107.37	29.6415
ILMN_2707207	Hhatl	108.35	25.3419
ILMN_2503715	Ttc7b	109.3	28.708
ILMN_2789888	Rnf10	109.36	19.1277
ILMN_2513451	AK004187	109.88	26.08
ILMN_1228762	Dvl1	110.08	24.5857
ILMN_1245673	Tmem38a	110.4	26.6257
ILMN_1221819	Fcgrt	110.41	20.3981
ILMN_2861123	Tmem150a	112.64	31.1729
ILMN_2477326	Dhrs4	113.02	19.2543
ILMN_1221288	Lgals8	113.11	27.5395
ILMN_2692733	Tmem117	114.68	32.5281
ILMN_2824167	Ecsit	115.28	22.5192
ILMN_2471128	Fam174b	115.98	21.4485
ILMN_2666061	Ndufa4	116.21	23.278
ILMN_2641278	Mfn2	116.3	22.2018
ILMN_2800687	Hr	117.11	33.6485
ILMN_2742152	Gadd45a	118.58	32.0026
ILMN_2698449	Hbegf	118.94	12.9082
ILMN_2897214	Murc	119.23	31.1039
ILMN_2713060	Fam131a	119.37	21.1052
ILMN_2517170	Tuba4a	120.12	25.0338
ILMN_1260262	Mrpl30	120.46	26.919
ILMN_1228942	Cd59a	121.53	27.6352
ILMN_2683630	Bfar	121.96	25.8206
ILMN_1240938	Mfsd6	122.35	22.1147
ILMN_2653265	H2-Ke6	124.23	20.3762
ILMN_1231795	Lace1	125.36	23.8656
ILMN_2695199	St3gal6	126.68	28.5459
ILMN_1248181	Zbtb7a	129.16	33.8567
ILMN_2615035	Mgst3	130.29	29.58
ILMN_2978040	Myh8	130.59	25.9892
ILMN_2822141	Lyrm5	132.05	28.6178
ILMN_2997382	Mterfd3	132.56	35.7597
ILMN_2792560	Ndufa3	132.78	21.5184
ILMN_1215252	Bmp4	133.77	16.9461
ILMN_1240346	Socs5	133.83	15.8707
ILMN_2646891	Arap2	134.73	20.3022
ILMN_2623046	Reep5	135.79	17.4763
ILMN_1231096	Tmem106b	136.03	21.6927
ILMN_2489448	Sobp	139.69	26.9963
ILMN_2445548	AK082757	139.86	29.7386
ILMN_1215901	Agpat2	140.45	20.9759
ILMN_2732961	Mff	141.32	21.7571
ILMN_2724545	Sbk1	143.55	20.591
ILMN_2428798	5031439G07Rik	144.21	15.7495
ILMN_2838308	Fmo1	144.73	11.4749
ILMN_2522884	Gm5057	145.91	20.674
ILMN_2618329	March2	147.32	15.5218
ILMN_1237846	Mpc2	147.46	17.4289
ILMN_3122961	Gbp2	150.92	22.6018
ILMN_2510771	Fam220a	152.26	16.4284
ILMN_2673024	Mrps24	153	16.8589
ILMN_2909782	Rras2	154.73	9.82149
ILMN_2686721	Tap2	155.6	11.2474
ILMN_2834777	Irf1	156.39	19.5137
ILMN_2593774	Rgcc	157.32	8.36646

## Sheet: A2
Probe_ID	Gene_symbol	Average_rank	sd
ILMN_2744193	Phyhd1	7.55	5.7126
ILMN_2792924	Gstk1	7.64	7.32578
ILMN_1219898	Dnajc28	8.12	6.17633
ILMN_2886610	Txlnb	8.13	9.14049
ILMN_2636183	Scube2	9.05	6.59564
ILMN_2482427	Zfp106	11.71	8.2808
ILMN_2764865	Oma1	12.95	8.87213
ILMN_2675029	Slc4a3	13.04	13.9312
ILMN_2923615	Ppm1k	16.82	10.5163
ILMN_1219748	Pxmp2	18.25	14.9797
ILMN_2921698	Pcca	20.6	13.0492
ILMN_2689265	Acad11	21.52	14.6642
ILMN_1222333	Slc2a4	21.86	20.8835
ILMN_1214024	2310002L09Rik	23.59	13.9668
ILMN_1256867	Slc25a26	25.24	18.156
ILMN_2621074	Ethe1	25.44	12.8498
ILMN_2617305	Nudt8	26.73	14.2728
ILMN_2509327	Wipf3	29.17	13.8097
ILMN_2756950	Trim54	31.78	14.1475
ILMN_1242333	Immp2l	31.97	29.751
ILMN_1242167	Hist2h2aa2	32.47	21.6666
ILMN_1225602	S100a1	34.78	19.4264
ILMN_1260175	Golga3	35.39	15.378
ILMN_2960108	Cyp27a1	35.77	21.9967
ILMN_2507725	Lpin1	36.19	19.0717
ILMN_1223335	Ano10	37.7	17.8996
ILMN_1259739	Mtr	38.97	17.3004
ILMN_1255556	Pink1	39.68	14.7305
ILMN_2526851	Abhd6	40.84	19.8656
ILMN_2847332	Mid1ip1	41.29	36.7537
ILMN_1236757	Oxct1	41.51	25.2721
ILMN_2601378	Tmem205	41.52	22.5905
ILMN_2663230	Slco3a1	41.59	34.592
ILMN_2733179	Aldh2	42.94	24.0029
ILMN_2617090	Egln1	44.11	26.8298
ILMN_2986899	Adk	45.07	24.7179
ILMN_2795791	Tmem38b	46.14	16.7169
ILMN_2452855	AK003388	47.19	22.9324
ILMN_3114641	Pik3r1	47.19	24.5067
ILMN_2774456	Coq9	47.87	23.3816
ILMN_1229082	Klhl21	50.29	28.3717
ILMN_2725428	Dnajb2	55.52	20.426
ILMN_1251766	Alkbh7	55.9	31.2282
ILMN_2738825	Acta1	56.44	16.7195
ILMN_2627328	Dnase2a	56.94	25.5678
ILMN_2726371	Nqo1	59.33	29.0364
ILMN_2464898	Amz2	60.52	35.7125
ILMN_2676074	Amd1	62.07	19.1761
ILMN_2658266	Gpr22	62.08	20.6528
ILMN_2757993	Dlat	62.45	25.8751
ILMN_2641431	Trak2	62.51	25.5103
ILMN_2999167	L2hgdh	64.64	35.1931
ILMN_2684855	Gpx4	66.28	23.9853
ILMN_1226103	5730455P16Rik	69.69	20.2628
ILMN_2718716	Kif21a	71.09	40.7419
ILMN_2681123	Stradb	72.47	37.3613
ILMN_1231053	Hist2h2aa1	72.48	27.6568
ILMN_2868987	Smpd1	73.82	26.1423
ILMN_2660943	9330158H04Rik	74.02	29.6934
ILMN_2907370	Optn	74.66	36.1104
ILMN_2605819	Egln3	74.9	31.4734
ILMN_2660505	Igsf1	75.3	48.4135
ILMN_2507494	Tmem141	75.64	43.7759
ILMN_2680665	Oxld1	75.81	29.6957
ILMN_2539489	Myo5b	76.64	31.1942
ILMN_2670472	AI464131	76.98	28.9245
ILMN_1238542	Fam213b	77.55	33.6246
ILMN_2692853	C030006K11Rik	79.16	34.4676
ILMN_2888181	Echs1	81.48	52.4756
ILMN_2585867	Jph1	81.67	37.5395
ILMN_1213681	0610009O20Rik	81.78	31.8933
ILMN_2938154	Sgca	81.81	41.0033
ILMN_2739295	Abhd5	84.54	37.8955
ILMN_1256564	Ak4	84.61	24.7863
ILMN_1218934	Rdm1	84.87	33.5892
ILMN_2688728	Pcyt1a	87.56	33.5669
ILMN_2606579	Tecr	87.67	46.5533
ILMN_2602630	Flad1	88.1	26.5667
ILMN_2832524	Gpt	88.88	28.8837
ILMN_2450384	Vegfb	88.9	29.8594
ILMN_2732229	Prdx3	89.22	29.8409
ILMN_1252057	Fbxo31	89.98	28.1134
ILMN_2707147	Rangrf	90.57	40.2982
ILMN_1256175	Pcmtd1	91.85	37.4086
ILMN_2716098	Hsph1	92.11	35.9612
ILMN_1225191	Naprt1	92.22	33.1308
ILMN_2735294	Gstm7	92.32	33.6731
ILMN_1254523	Gsto1	92.54	34.784
ILMN_2536389	Gm10355	93.64	31.2117
ILMN_2596297	Ddt	94.84	33.1464
ILMN_3034877	Kif1b	95.56	37.4409
ILMN_2595091	Nhlrc1	95.62	28.0042
ILMN_2500276	Ccng1	95.77	36.684
ILMN_1259535	2210015D19Rik	97.05	66.9342
ILMN_3001598	Ptpn11	97.87	37.8814
ILMN_2624854	Gstm2	97.96	35.8022
ILMN_1236008	Isoc2a	98.78	32.9087
ILMN_2719202	Hist1h2bf	99.22	27.192
ILMN_2623591	Apbb1	99.61	41.0087
ILMN_1227033	Mrpl44	99.83	30.9255
ILMN_2718974	Rpusd4	100.21	35.1514
ILMN_3141648	Mylk3	100.73	52.6757
ILMN_3106592	Rcan2	100.84	46.0993
ILMN_2636536	Pla2g12a	103.02	26.3293
ILMN_2687111	Arfgef1	104.37	52.0401
ILMN_2955322	Mtrf1	104.89	38.1162
ILMN_2752618	Slc35e1	105.36	33.2877
ILMN_1259582	Mccc2	106.49	39.3909
ILMN_2848353	Zfp771	107.5	54.9864
ILMN_2712557	Vimp	107.97	25.7696
ILMN_2632264	Acot7	109.03	35.7371
ILMN_2909346	Mapkapk3	109.66	43.9134
ILMN_2737658	Pdk2	112.38	33.9979
ILMN_2972627	Hint3	113.59	48.6868
ILMN_2924243	Itgb1bp1	114.04	42.8867
ILMN_1256463	Tmem159	114.39	29.9922
ILMN_2698757	Ppm1l	114.72	37.7094
ILMN_2681583	Nipal3	115.81	38.8477
ILMN_1223551	Rrp9	118.66	40.9146
ILMN_2742592	Hist1h2bh	118.71	25.4242
ILMN_2715234	Rnmtl1	118.71	27.7734
ILMN_2704429	Doc2g	120.02	49.3274
ILMN_1235347	Pgap2	120.6	37.8022
ILMN_2604467	Tmem42	122.05	37.7711
ILMN_2741039	Ccdc146	122.29	30.2098
ILMN_2588474	Homer2	122.61	32.5874
ILMN_2610531	Spr	122.82	33.2053
ILMN_2686252	Ppip5k1	123.44	34.656
ILMN_2660175	Fbxo6	124.22	52.5118
ILMN_2879848	St3gal3	125.16	35.526
ILMN_3122427	Suclg2	125.37	27.8835
ILMN_2605512	Lamb3	126.25	29.902
ILMN_2870672	Fbln1	127.06	38.1382
ILMN_2626389	Nomo1	127.11	35.0215
ILMN_2488405	Tfdp2	128.42	31.3537
ILMN_2734181	Acss2	128.84	27.0352
ILMN_2479530	Zhx1	129.13	35.7589
ILMN_2990197	Bola3	130.85	26.7187
ILMN_2987937	Golga4	133.6	31.8868
ILMN_2746704	Smim20	134.16	34.1354
ILMN_2472504	Pcyox1	134.93	29.1358
ILMN_1216085	Ankrd12	135.28	42.1956
ILMN_2731769	Plekhb2	136.44	35.7201
ILMN_1220309	Cep63	136.56	41.6535
ILMN_2805071	Ap4s1	137.02	40.3557
ILMN_2706051	Ccdc47	138.84	31.477
ILMN_2652511	Hist1h2bj	139.01	24.8667
ILMN_2873180	Smim8	139.26	46.2157
ILMN_1254720	Wwp1	139.38	35.8546
ILMN_2727785	Cbr4	141.24	28.2378
ILMN_2728118	Rrp12	141.69	29.3807
ILMN_2606470	Clip4	142.12	34.4601
ILMN_1240165	Acy3	142.19	44.1613
ILMN_1223547	Yif1a	143.06	40.4247
ILMN_2728584	Alpk2	143.28	30.4542
ILMN_2762380	Enpp4	144.06	27.9877
ILMN_1223313	Fn3k	145.52	41.6902
ILMN_1217043	Got1	146.73	35.0647
ILMN_1248254	Gfm1	147.75	30.1043
ILMN_2525289	C330018D20Rik	150.11	34.8862
ILMN_2891646	Hist1h2bm	150.57	19.8943
ILMN_1213920	Mkrn2	153.57	27.3667
ILMN_1213286	Ccl21a	154.49	46.946
ILMN_2757489	Ppp1r11	154.99	34.0088
ILMN_1252649	Dguok	155.79	45.1011
ILMN_2711966	Mrpl1	155.96	40.9419
ILMN_2669487	Kcnk3	156.03	29.393
ILMN_1247245	Smim12	156.07	46.3413
ILMN_2992232	Mlxipl	158.06	31.486
ILMN_2728038	Arhgap24	158.47	53.9763
ILMN_2900944	Nek9	160.18	45.6945
ILMN_2602139	Ccl21b	160.21	48.6485
ILMN_2924715	Lsmem1	160.74	36.0223
ILMN_2762944	Ifi27l2a	160.91	27.7907
ILMN_1233531	Cmss1	161.78	29.2673
ILMN_1223358	Setd6	162.06	28.5193
ILMN_2543456	Dnlz	164.02	27.399
ILMN_3005441	Ppa1	165.37	51.0598
ILMN_1223447	Rabl6	167.75	41.2216
ILMN_2589790	Stat3	168.88	21.9123
ILMN_1256950	Neurl2	169.3	47.3932
ILMN_2715629	Fundc2	170	34.1509
ILMN_2995370	Mief2	170.27	27.7197
ILMN_3160863	Dusp23	171.22	34.7053
ILMN_1236136	Corin	171.67	32.6227
ILMN_3116560	St3gal5	172.26	20.7348
ILMN_1257520	Hist1h2bn	172.31	17.1433
ILMN_2794608	Bcat2	172.51	53.9112
ILMN_2534018	Pdss2	174.44	19.8979
ILMN_2750314	Opa3	175.24	33.1833
ILMN_2546510	Gm5617	175.27	18.2224
ILMN_2746812	Zswim7	175.43	23.5073
ILMN_2660803	Bckdhb	176.05	26.1508
ILMN_2791551	Zcrb1	176.99	25.1808
ILMN_2473620	Clip1	178.23	42.7811
ILMN_2869100	D3Ertd751e	178.46	27.6787
ILMN_1252111	Arl6ip5	180.95	27.189
ILMN_2965275	Inpp5a	181.64	29.5237
ILMN_2618461	Pam16	184.32	27.4428
ILMN_2758198	Sord	184.44	22.5085
ILMN_1242399	Hist1h2bc	187.44	21.3093
ILMN_2704641	Dph3	188.28	20.1495
ILMN_2950286	Ankrd1	188.48	23.8639
ILMN_2614212	Mapkapk2	191.75	18.4689
ILMN_3107945	Cep112	192.28	20.855
ILMN_2591570	Stk11	192.51	24.0095
ILMN_2727235	Ankrd11	193.46	14.1959
ILMN_2592909	Mettl22	195.82	31.4262
ILMN_2745370	Sult1a1	203.54	11.4693
ILMN_2596569	Ptges3l	206.14	8.26703
ILMN_2753021	Rnf166	206.87	8.2617

[truncated: 6 more sheets: A3, A4, A5, A6, AT1, AT3]
